# Supplementary material
Source: PubMed Central journal article supplement (PMC3021447)
Supplement: supp_jn.110.131235_nut131235.pdf [file supp_jn.110.131235_nut131235.pdf]

## “On line Supporting Material”

### **Acknowledgements**

The authors express their thanks to Dr Ian Brown, Sullivan and Nicolaidis Pathology, Dr Neal Walker, Queensland Medical Laboratories and the Queensland Health Pathology Service for identifying participants for the Study of Digestive Health.

### **Study of Digestive Health Investigators**

**Investigators** : David C. Whiteman MBBS, PhD, Adele C. Green MBBS PhD, Nicholas K. Hayward PhD, Peter G. Parsons PhD, Sandra J. Pavey PhD, David M. Purdie PhD, Penelope M. Webb D Phil; David Gotley FRACS, B. Mark Smithers FRACS; Glyn G. Jamieson FRACS ; Paul Drew PhD, David I. Watson FRACS; Andrew Clouston PhD, FRCPA.

**Project Manager:** Suzanne O'Brien RN, MPH;

**Research Scientist:** Derek Nancarrow PhD;

**Research nurses:** Andrea McMurtrie RN, Linda Terry RN MPH, Michael Connard B Sc (Hons), Deborah Roffe RN, Lorelle Smith EN, Marian Martin RN.

### **The Australian Cancer Study Investigators**

**Investigators** : David C. Whiteman MBBS, PhD, Penelope M. Webb MA, D Phil, Adele C. Green MBBS, PhD, Nicholas K. Hayward PhD, Peter G. Parsons PhD, David M. Purdie PhD

**Clinical collaborators** : B. Mark Smithers FRACS, David Gotley FRACS PhD, Andrew Clouston FRACP PhD, Ian Brown FRACP

**Project Manager:** Suzanne Moore RN, MPH.

**Database** : Karen Harrap BIT, Troy Sadkowski BIT.

**Research Nurses:** Suzanne O'Brien RN MPH, Ellen Minehan RN, Deborah Roffe RN, Sue O'Keefe RN, Suzanne Lipshut RN, Gabby Connor RN, Hayley Berry RN, Frances Walker RN, Teresa Barnes RN, Janine Thomas RN, Linda Terry RN MPH, Michael Connard B Sc, Leanne Bowes B Sc, MaryRose Malt RN, Jo White RN.

#### **Clinical Contributors:**

*Australian Capital Territory:* Charles Mosse FRACS, Noel Tait FRACS

*New South Wales:* Chris Bambach FRACS, Andrew Biankan FRACS, Roy Brancatisano FRACS, Max Coleman FRACS, Michael Cox FRACS, Stephen Deane FRACS, Gregory L. Falk FRACS, James Gallagher FRACS, Mike Hollands FRACS, Tom Hugh FRACS, David Hunt FRACS, John Jorgensen FRACS, Christopher Martin FRACS, Mark Richardson FRACS, Garrett Smith FRACS, Ross Smith FRACS, David Storey FRACS

*Queensland:* John Avramovic FRACS, John Croese FRACP, Justin D'Arcy FRACS, Stephen Fairley FRACP, John Hansen FRACS, John Masson FRACP, Les Nathanson FRACS, Barry O'Loughlin FRACS, Leigh Rutherford FRACS, Richard Turner FRACS, Morgan Windsor FRACS

*South Australia:* Justin Bessell FRACS, Peter Devitt FRACS, Glyn Jamieson FRACS, David Watson FRACS

*Victoria:* Stephen Blamey FRACS, Alex Boussioutas FRACP, Richard Cade FRACS, Gary Crosthwaite FRACS, Ian Faragher FRACS, John Gribbin FRACS, Geoff Hebbard FRACP, George Kiroff FRACS, Bruce Mann FRACS, Bob Millar FRACS, Paul O'Brien FRACS, Robert Thomas FRACS, Simon Wood FRACS

*Western Australia:* Steve Archer FRACS, Kingsley Faulkner FRACS, Jeff Hamdorf FRACS.
